# Supplementary material
Source: PubMed Central journal article supplement (PMC7462457)
Supplement: mmc1.pdf [file mmc1.pdf]

## Supplemental Information

### **Activate: Randomized Clinical Trial of BCG Vaccination against Infection in the Elderly**

**Evangelos J. Giamarellos-Bourboulis, Maria Tsilika, Simone Moorlag, Nikolaos Antonakos, Antigone Kotsaki, Jorge Domínguez-Andrés, Evdoxia Kyriazopoulou, Theologia Gkavogianni, Maria-Evangelia Adami, Georgia Damoraki, Panagiotis Koufargyris, Athanassios Karageorgos, Amalia Bolanou, Hans Koenen, Reinout van Crevel, Dionyssia-Irene Droggiti, George Renieris, Antonios Papadopoulos, and Mihai G. Netea**

# **ACTIVATE: RANDOMIZED CLINICAL TRIAL OF BCG VACCINATION AGAINST INFECTION IN THE ELDERLY**

## **SUPPLEMENTARY MATERIAL**

**Evangelos J. Giamarellos-Bourboulis<sup>1\*</sup>, Maria Tsilika<sup>1</sup>, Simone Moorlag<sup>2</sup>, Nikolaos Antonakos<sup>1</sup>, Antigone Kotsaki<sup>1</sup>, Jorge Domínguez-Andrés<sup>2</sup>, Evdoxia Kyriazopoulou<sup>1</sup>, Theologia Gkavogianni<sup>1</sup>, Maria-Evangelia Adami<sup>1</sup>, Georgia Damoraki<sup>1</sup>, Panagiotis Koufargyris<sup>1</sup>, Athanassios Karageorgos<sup>1</sup>, Amalia Bolanou<sup>1</sup>, Hans Koenen<sup>3</sup>, Reinout van Crevel<sup>2</sup>, Dionyssia-Irene Droggiti<sup>1</sup>, George Renieris<sup>1</sup>, Antonios Papadopoulos<sup>1</sup>, Mihai G. Netea<sup>2,4</sup>**

<sup>1</sup>4<sup>th</sup> Department of Internal Medicine, National and Kapodistrian University of Athens, Medical School, 124 62 Athens, Greece;

<sup>2</sup>Department of Internal Medicine and Radboud Center for Infectious Diseases, Radboud University Medical Center, 6500 Nijmegen, The Netherlands;

<sup>3</sup>Department of Laboratory Medicine, Radboud University Medical Center, 6500 Nijmegen, The Netherlands

<sup>4</sup> Department of Immunology and Metabolism, Life & Medical Sciences Institute, University of Bonn, 53115 Bonn, Germany.

**Data S1/Methods S1: Statistical plan for interim analysis of the ACTIVATE trial.****Related to STAR Methods**

The trial sample size was calculated on the assumption that the median time to new infection would be 4 months in the placebo group and 7 months with BCG vaccination. To achieve so with 90% power at the 5% level of significance, 100 patients were allocated to each arm. Under these prerequisites, the study is sufficiently powered to prove that differences in the first time incidence of infection between the placebo and the BCG group of the order of 20% will be statistically significant.

The primary outcome was the time, in weeks, of the appearance of first new infection, censored at twelve months after vaccination. Differences between the placebo and BCG vaccination groups were assessed with the hazard ratio (HR), of the Cox proportional hazards regression model with its 95% confidence intervals (CI). The corresponding p-values were also reported. The effects of other confounders, both at the univariate and the multivariate Cox model were also assessed with the corresponding HR. Only variables found to be significant in the univariate analysis entered in the stepwise multivariate analysis and they were retained in the model only if they had a significant effect after adjusting for the other effects. The proportionality of the hazard function at different levels throughout the follow-up period was assessed with the Schoenfeld residuals method (Xue et. al., 2013). Since this was an interim analysis, a sensitivity analysis was also performed for the total number of participants with the primary aim to show that individuals that were censored had the same probability of experiencing a subsequent event as individuals that remain in the study

Between groups differences were assessed depending on the nature of the parameters: for continuous variables following the normal distribution the independent samples t-test was employed, while in the absence of normality in the distribution the Mann-Whitney U-test was employed. The number of infections in each group was expressed as patient-infections per year. The same analysis was done for the secondary endpoints. The frequency of adverse events was compared by the Fisher's exact test.

The interim analysis included only patients with completed 12-month of follow-up. In order to preserve the overall Type I error rate at 5%, an adjustment of the level of significance of the interim and final analysis was done by O'Brien-Fleming strict alpha adjustment. This adjustment provides significance  $\alpha=0.0054$  at interim and  $\alpha=0.0492$  at final (deMets, & Gordon Lan, 1994). The purpose of using this seemingly unattainable level of significance at interim analysis was to allow the study to conclude, at the same time providing evidence that the required level of significance will be attained at the final stage. Statistical analysis was performed with the IBM SPSS Statistics for Windows, version 25 (IBM Corp., Armonk, N.Y., USA) and corroborated with the R statistical package (R Core Team, 2013).

Cytokine data were expressed for each group of vaccination as the ratio of the cytokine production at month 3 versus the production at month 0 (before vaccination). Receiver operator characteristic curve analysis was done to discriminate the ratio of each cytokine that can better differentiate the two groups of vaccination. The best cut-off of this ratio was selected by the co-ordinate points of the curve using the Youden index. Patients above and below this cut-off were compared between groups by the Fisher's exact test. Analysis was conducted using IBM SPSS Statistics v. 25.0.

All p values were two-sided and any p value  $<0.05$  was considered as statistically significant.

## SUPPLEMENTARY TABLES

**Table S1. Causes of hospital admission before study enrolment. Related to**

**Table 1.**

| <b>Cause of hospital admission</b>          | <b>Placebo (N=78)</b> | <b>BCG (N=72)</b> | <b>p-value</b> |
|---------------------------------------------|-----------------------|-------------------|----------------|
| Lower respiratory tract infection — no. (%) | 20 (25.6)             | 23 (31.9)         | 0.471          |
| Biliary tract infection — no. (%)           | 8 (10.3)              | 7 (9.7)           | 1.000          |
| Ischemic stroke — no. (%)                   | 10 (12.8)             | 12 (16.7)         | 0.645          |
| Acute kidney injury — no. (%)               | 4 (5.1)               | 4 (5.6)           | 1.000          |
| Gastrointestinal tract bleeding — no. (%)   | 8 (10.3)              | 6 (8.3)           | 0.783          |
| Anemia — no. (%)                            | 4 (5.1)               | 2 (2.8)           | 0.683          |
| Electrolyte disturbance — no. (%)           | 2 (2.5)               | 4 (5.6)           | 0.428          |
| Pulmonary embolism — no. (%)                | 2 (2.6)               | 2 (2.8)           | 1.000          |
| Cerebral hemorrhage — no. (%)               | 1 (1.3)               | 1 (1.4)           | 1.000          |
| Acute pyelonephritis — no. (%)              | 6 (7.7)               | 2 (2.8)           | 0.279          |
| ABSSI — no. (%)                             | 4 (5.1)               | 0 (0)             | 0.121          |
| Other disease — no. (%)                     | 9 (11.5)              | 8 (11.1)          | 1.000          |

Abbreviation: ABSSSI: acute bacterial skin and skin structure infection

**Table S2. Sensitivity analysis of the incidence of new infections. Related to Figure 2.**

|               | Placebo<br>n/ total (%) | BCG<br>n/total (%) | Difference in<br>proportions | HR   | 95% CI    | p-value |
|---------------|-------------------------|--------------------|------------------------------|------|-----------|---------|
|               |                         |                    | % (95% CI)                   |      |           |         |
| Interim (150) | 33/78<br>(42.3)         | 18/72<br>(25.0)    | 17.3<br>(2.1-31.3)           | 0.55 | 0.31-0.97 | 0.035   |
| Total (198)   | 41/98<br>(41.8)         | 27/100<br>(27.0)   | 14.8<br>(1.6-27.4)           | 0.59 | 0.36-0.95 | 0.029   |

Abbreviations: CI: confidence interval; OR: odds ratio

**Table S3. Overview of analyzed circulating inflammatory markers. Related to Methods Details.**

|                       | FDR_OVERALL.D14 | FDR_OVERALL.D90 |
|-----------------------|-----------------|-----------------|
| IL8_P10145            | 0.996582031     | 0.996582031     |
| VEGFA_P15692          | 0.996582031     | 0.996582031     |
| CD8A_P01732           | 0.996582031     | 0.996582031     |
| MCP.3_P80098          | 0.996582031     | 0.996582031     |
| GDNF_P39905           | 0.996582031     | 0.996582031     |
| CDCP1_Q9H5V8          | 0.996582031     | 0.996582031     |
| CD244_Q9BZW8          | 0.996582031     | 0.996582031     |
| IL7_P13232            | 0.996582031     | 0.996582031     |
| OPG_O00300            | 0.996582031     | 0.996582031     |
| LAP.TGF.beta.1_P01137 | 0.996582031     | 0.996582031     |
| uPA_P00749            | 0.996582031     | 0.996582031     |
| IL6_P05231            | 0.996582031     | 0.996582031     |
| IL.17C_Q9P0M4         | 0.891113281     | 0.996582031     |
| MCP.1_P13500          | 0.996582031     | 0.996582031     |
| IL.17A_Q16552         | 0.996582031     | 0.996582031     |
| CXCL11_O14625         | 0.996582031     | 0.996582031     |
| AXIN1_O15169          | 0.996582031     | 0.996582031     |
| TRAIL_P50591          | 0.996582031     | 0.996582031     |
| CXCL9_Q07325          | 0.996582031     | 0.996582031     |
| CST5_P28325           | 0.996582031     | 0.996582031     |
| OSM_P13725            | 0.996582031     | 0.996582031     |
| CXCL1_P09341          | 0.996582031     | 0.996582031     |
| CCL4_P13236           | 0.996582031     | 0.996582031     |
| CD6_Q8WWJ7            | 0.996582031     | 0.996582031     |
| SCF_P21583            | 0.996582031     | 0.996582031     |
| IL18_Q14116           | 0.996582031     | 0.996582031     |
| SLAMF1_Q13291         | 0.996582031     | 0.996582031     |
| TGF.alpha_P01135      | 0.996582031     | 0.996582031     |
| MCP.4_Q99616          | 0.996582031     | 0.996582031     |
| CCL11_P51671          | 0.996582031     | 0.996582031     |
| TNFSF14_O43557        | 0.996582031     | 0.996582031     |
| FGF.23_Q9GZV9         | 0.996582031     | 0.996582031     |
| IL.10RA_Q13651        | 0.996582031     | 0.996582031     |
| MMP.1_P03956          | 0.996582031     | 0.996582031     |
| LIF.R_P42702          | 0.996582031     | 0.996582031     |
| FGF.21_Q9NSA1         | 0.996582031     | 0.996582031     |
| CCL19_Q99731          | 0.996582031     | 0.996582031     |
| IL.10RB_Q08334        | 0.996582031     | 0.996582031     |
| IL.18R1_Q13478        | 0.996582031     | 0.996582031     |
| PD.L1_Q9NZQ7          | 0.996582031     | 0.996582031     |
| Beta.NGF_P01138       | 0.996582031     | 0.996582031     |
| CXCL5_P42830          | 0.996582031     | 0.996582031     |



|                |             |             |
|----------------|-------------|-------------|
| TRANCE_O14788  | 0.996582031 | 0.996582031 |
| HGF_P14210     | 0.996582031 | 0.996582031 |
| IL.12B_P29460  | 0.996582031 | 0.996582031 |
| MMP.10_P09238  | 0.996582031 | 0.996582031 |
| IL10_P22301    | 0.996582031 | 0.996582031 |
| CCL23_P55773   | 0.996582031 | 0.996582031 |
| CD5_P06127     | 0.996582031 | 0.996582031 |
| CCL3_P10147    | 0.996582031 | 0.996582031 |
| Flt3L_P49771   | 0.996582031 | 0.996582031 |
| CXCL6_P80162   | 0.996582031 | 0.996582031 |
| CXCL10_P02778  | 0.996582031 | 0.996582031 |
| XE.BP1_Q13541  | 0.996582031 | 0.996582031 |
| SIRT2_Q8IXJ6   | 0.996582031 | 0.996582031 |
| CCL28_Q9NRJ3   | 0.996582031 | 0.996582031 |
| DNER_Q8NFT8    | 0.996582031 | 0.996582031 |
| EN.RAGE_P80511 | 0.996582031 | 0.996582031 |
| CD40_P25942    | 0.996582031 | 0.996582031 |
| FGF.19_O95750  | 0.996582031 | 0.996582031 |
| MCP.2_P80075   | 0.996582031 | 0.996582031 |
| CASP.8_Q14790  | 0.996582031 | 0.996582031 |
| CCL25_O15444   | 0.996582031 | 0.996582031 |
| CX3CL1_P78423  | 0.996582031 | 0.996582031 |
| TNFRSF9_Q07011 | 0.996582031 | 0.996582031 |
| NT.3_P20783    | 0.996582031 | 0.996582031 |
| TWEAK_O43508   | 0.996582031 | 0.996582031 |
| CCL20_P78556   | 0.996582031 | 0.891113281 |
| ST1A1_P50225   | 0.996582031 | 0.996582031 |
| STAMPB_O95630  | 0.996582031 | 0.996582031 |
| ADA_P00813     | 0.996582031 | 0.996582031 |
| TNFB_P01374    | 0.996582031 | 0.996582031 |
| CSF.1_P09603   | 0.996582031 | 0.996582031 |

**Table S4. Synopsis of ongoing interventional clinical trials studying the protective effect of BCG vaccination on Covid-19 (as of July 10 2020; source: Clinicaltrials.gov). Related to STAR Methods and to Discussion**

| <b>Registration number</b> | <b>Acronym</b> | <b>State</b>       | <b>Study title</b>                                                                                               | <b>Population</b> | <b>N</b> | <b>Design and Groups</b> | <b>Primary endpoint</b>                           |
|----------------------------|----------------|--------------------|------------------------------------------------------------------------------------------------------------------|-------------------|----------|--------------------------|---------------------------------------------------|
| NCT04328441                | BCG-CORONA     | Recruiting         | Reducing health care workers absenteeism in Covid-19 pandemic through BCG vaccine                                | HCWs              | 1500     | RCT<br>Placebo/BCG       | HCW absenteeism                                   |
| NCT04379336                |                | Recruiting         | BCG vaccination for healthcare workers in COVID-19 pandemic                                                      | HCWs              | 500      | RCT<br>Placebo/BCG       | Incidence of HCWs hospitalized due to COVID-19    |
| NCT04327206                | BRACE          | Recruiting         | BCG vaccination to protect healthcare workers against COVID-19                                                   | HCWs              | 10078    | RCT<br>Placebo/BCG       | COVID-19 disease incidence                        |
| NCT04414267                | ACTIVATE II    | Recruiting         | Bacillus Calmette-guérin vaccination to prevent COVID-19                                                         | COPD, CHD, CCI>3  | 900      | RCT<br>Placebo/BCG       | Composite on COVID-19 incidence                   |
| NCT04348370                | BADAS          | Recruiting         | BCG vaccine for health care workers as defense against COVID 19                                                  | HCWs              | 1800     | RCT<br>Placebo/BCG       | Incidence of COVID 19 Infection                   |
| NCT04362124                |                | Not yet recruiting | Performance evaluation of BCG vaccination in healthcare personnel to reduce the severity of SARS-COV-2 Infection | HCWs              | 1000     | RCT<br>Placebo/BCG       | Incidence of confirmed or probable COVID-19 cases |

|             |           |                    |                                                                                                                          |         |      |                    |                                                        |
|-------------|-----------|--------------------|--------------------------------------------------------------------------------------------------------------------------|---------|------|--------------------|--------------------------------------------------------|
| NCT04417335 |           | Not yet recruiting | Reducing COVID-19 related hospital admission in elderly by BCG vaccination                                               | Elderly | 2014 | RCT<br>Placebo/BCG | SARS-CoV-2 related hospital admission                  |
| NCT04350931 |           | Not yet recruiting | Application of BCG Vaccine for immune-prophylaxis among Egyptian healthcare workers during the pandemic of COVID-19      | HCWs    | 900  | RCT<br>Placebo/BCG | Incidence of confirmed COVID-19                        |
| NCT04461379 |           | Not yet recruiting | Prevention, efficacy and safety of BCG vaccine in COVID-19 among healthcare workers                                      | HCWs    | 908  | RCT<br>Placebo/BCG | Cumulative incidence of infection in 6 months          |
| NCT04373291 |           | Not yet recruiting | Using BCG vaccine to protect health care workers in the COVID-19 pandemic                                                | HCWs    | 1500 | RCT<br>Placebo/BCG | Number of days of unplanned absenteeism for any reason |
| NCT04384549 | COVID-BCG | Not yet recruiting | Efficacy of BCG vaccination in the prevention of COVID19 via the strengthening of innate immunity in health care workers | HCWs    | 1120 | RCT<br>Placebo/BCG | Incidence of documented COVID-19                       |

Abbreviations CCI: Charlson's comorbidity index; CHD: coronary heart disease; COPD: chronic obstructive pulmonary disease;

HCW: health care worker; RCT: randomized clinical trial
